# Supplementary material for: On the Order of the Fractional Laplacian in Determining the Spatio-Temporal Evolution of a Space-Fractional Model of Cardiac Electrophysiology
Source: PubMed Central journal article supplement (PMC4668072; doi:10.1371/journal.pone.0143938), 2015-12-02
Supplement: pone.0143938.s001.pdf [file pone.0143938.s001.pdf]

# S1 Appendix

## The BR cell model

The BR model consists of a system of eight ordinary differential equations: one for the transmembrane potential  $v$  and seven for a vector of secondary variables  $\mathbf{z} = (m, h, j, d, f, x, c)^T$ . The six variables  $m, h, j, d, f$  and  $x$  are the gating variables of the model and  $c = 10^7[\text{Ca}]_i$  represent the intracellular calcium concentration and has been scaled to simplify the notation.

Due to the similar form of the six equations describing the evolution in time of the six gating variables, we formulate here the BR model only in terms of the following three equations:

$$C_m \frac{dv}{dt} + I_{\text{ion}} = I_{\text{stim}}, \quad (1)$$

$$\frac{dg}{dt} = \alpha_g(v)(1 - g) - \beta_g(v)g, \quad (2)$$

$$\frac{dc}{dt} = 0.07(1 - c) - I_s, \quad (3)$$

where equation (2) describes the evolution in time of the generic gating variable  $g$  ( $= m, h, j, d, f, x$ ) and the functions  $\alpha_g(v)$  and  $\beta_g(v)$  describe the channel opening and closing rates for the particular gating variable  $g$  to which the equation is referring to. For all six gating variables, both  $\alpha_g$  and  $\beta_g$  have the form

$$\frac{C_1 \exp(C_2(v + C_3)) + C_4(v + C_5)}{\exp(C_6(v + C_3)) + C_7}, \quad (4)$$

where the values and the units of the constants involved are specified in Table 1.

The coupling term between equation (1) and the system describing the temporal evolution of the secondary variables in  $\mathbf{z}$  is the ionic current  $I_{\text{ion}} = I_{\text{ion}}(v, \mathbf{z})$ . In the BR cell model the ionic current is the sum of four different components and according to the original formulation [1], it can be written as follows:

$$I_{\text{ion}} = I_{\text{Na}} + I_{\text{K}} + I_x + I_s, \quad (5)$$

where  $I_{\text{Na}}$  is the current carried by sodium

$$I_{\text{Na}} = (4m^3hj + 0.003)(v - 50),$$

$I_{\text{K}}$  and  $I_x$  are potassium currents defined, respectively, by

$$I_{\text{K}} = 0.35 \left\{ \frac{4(\exp(0.04(v + 85)) - 1)}{\exp(0.08(v + 53)) + \exp(0.04(v + 53))} + \frac{0.2(v + 23)}{1 - \exp(-0.04(v + 23))} \right\},$$

$$\text{and} \quad I_x = 0.8x \frac{\exp(0.04(v + 77)) - 1}{\exp(0.04(v + 35))},$$

| $\text{ms}^{-1}$ | $C_1$<br>$\text{ms}^{-1}$ | $C_2$<br>$\text{mV}^{-1}$ | $C_3$<br>$\text{mV}$ | $C_4$<br>$\text{mV}^{-1} \cdot \text{ms}^{-1}$ | $C_5$<br>$\text{mV}$ | $C_6$<br>$\text{mV}^{-1}$ | $C_7$<br>- |
|------------------|---------------------------|---------------------------|----------------------|------------------------------------------------|----------------------|---------------------------|------------|
| $\alpha_m$       | 0                         | 0                         | 47                   | -1                                             | 47                   | -0.1                      | -1         |
| $\beta_m$        | 40                        | -0.056                    | 72                   | 0                                              | 0                    | 0                         | 0          |
| $\alpha_h$       | 0.126                     | -0.25                     | 77                   | 0                                              | 0                    | 0                         | 0          |
| $\beta_h$        | 1.7                       | 0                         | 22.5                 | 0                                              | 0                    | -0.082                    | 1          |
| $\alpha_j$       | 0.055                     | -0.25                     | 78                   | 0                                              | 0                    | -0.2                      | 1          |
| $\beta_j$        | 0.3                       | 0                         | 32                   | 0                                              | 0                    | -0.1                      | 1          |
| $\alpha_d$       | 0.095                     | -0.01                     | -5                   | 0                                              | 0                    | -0.72                     | 1          |
| $\beta_d$        | 0.07                      | -0.017                    | 44                   | 0                                              | 0                    | 0.05                      | 1          |
| $\alpha_f$       | 0.012                     | -0.008                    | 28                   | 0                                              | 0                    | 0.15                      | 1          |
| $\beta_f$        | 0.0065                    | -0.02                     | 30                   | 0                                              | 0                    | -0.2                      | 1          |
| $\alpha_x$       | 0.0005                    | 0.083                     | 50                   | 0                                              | 0                    | 0.057                     | 1          |
| $\beta_x$        | 0.0013                    | -0.06                     | 20                   | 0                                              | 0                    | -0.04                     | 1          |

Table 1: Parameter values for the Beeler–Reuter model as given in [1].

and  $I_s$  is the calcium current given by

$$I_s = 0.09 d f (v + 82.3 + 13.0287 \ln(10^{-7} c)).$$

In the equations above, all currents are in  $\mu\text{A} \cdot \text{cm}^{-2}$ ,  $v$  is in mV, the six gating variables are dimensionless,  $[\text{Ca}]_i$  is in moles per litre ( $\text{mole} \cdot \text{l}^{-1}$ ), and time is expressed in ms.

## References

- [1] Beeler GW, Reuter H. Reconstruction of the action potential of ventricular myocardial fibres. *J. Physiol.* 1977;268:177-210.
